# Supplementary material for: Fluoroquinolones and Other Antibiotics Redeemed for Cystitis—A Swedish Nationwide Cohort Follow-Up Study (2006–2018)
Source: MDPI journal article supplement (doi:10.3390/antibiotics11020172), 2022-01-28
Supplement: s1 [file s1]

## Supplementary Material

**Table S1.** Number of specific UTI antibiotics in the four most common antibiotic treatment groups for uncomplicated cystitis (2006–2013)

| Groups | Specific UTI antibiotics in each group | 2006   | 2007   | 2008   | 2009   | 2010   | 2011   | 2012   | 2013   | All     |
|--------|----------------------------------------|--------|--------|--------|--------|--------|--------|--------|--------|---------|
| J01CA  | <b>Amoxicillin</b> (J01CA04)           | 133    | 111    | 78     | 59     | 45     | 51     | 39     | 34     | 550     |
|        | <b>Pivmecillinam</b> (J01CA08)         | 13 437 | 12 530 | 13 229 | 12 255 | 12 206 | 11 554 | 10 267 | 9768   | 95 246  |
| J01XE  | <b>Nitrofurantoin</b> (J01XE01)        | 3093   | 3473   | 2815   | 4283   | 5411   | 5465   | 5177   | 4559   | 34 276  |
| J01EA  | <b>Trimethoprim</b> (J01EA01)          | 8150   | 5386   | 3438   | 2079   | 1556   | 974    | 591    | 416    | 22 590  |
| J01MA  | <b>Ciprofloxacin</b> (J01MA02)         | 1171   | 1081   | 830    | 727    | 675    | 546    | 466    | 498    | 5994    |
|        | <b>Norfloxacin</b> (J01MA06)           | 2128   | 1102   | 351    | 83     | 72     | 36     | 15     | 6      | 3793    |
|        | All UTI specific antibiotics           | 29 146 | 24 406 | 21265  | 19 780 | 20 215 | 18 853 | 16 769 | 15 437 | 165 871 |

Each case represents one patient only. UTI=Urinary tract infection. Cephalosporins (J01DB-E,I), Sulphonamides/Trimethoprim combinations (J01EE), and beta-lactam/b-lactam inhibitor combination (J01CR) were too few to be included. No sulphonamide antibiotics (J01EB, J01EC, J01ED) or fosfomycin (J01XX01) were identified. Each patient could only be included once during the study period. Data from the Swedish Prescribed Drug Register.
